# Supplementary material for: Global warming makes weather in boreal summer more persistent
Source: Copernicus journal article supplement (doi:10.5194/wcd-2020-40), 2020-08-28
Supplement: Supplementary file 1 [file wcd-2020-40-supplement.pdf]

## Supplementary Material

### Global warming makes weather in boreal summer more persistent

Dim Coumou<sup>1,2†</sup> and Paolo De Luca<sup>1†</sup>

<sup>1</sup>Department of Water and Climate Risk, Institute for Environmental Studies (IVM), Vrije Universiteit Amsterdam, Amsterdam, 1081 HV, the Netherlands

<sup>2</sup>Royal Netherlands Meteorological Institute (KNMI), De Bilt, 3730 AE, the Netherlands

†These authors contributed equally to the work

Correspondence to: Dim Coumou ([d.coumou@vu.nl](mailto:d.coumou@vu.nl))

## Supplementary Figures

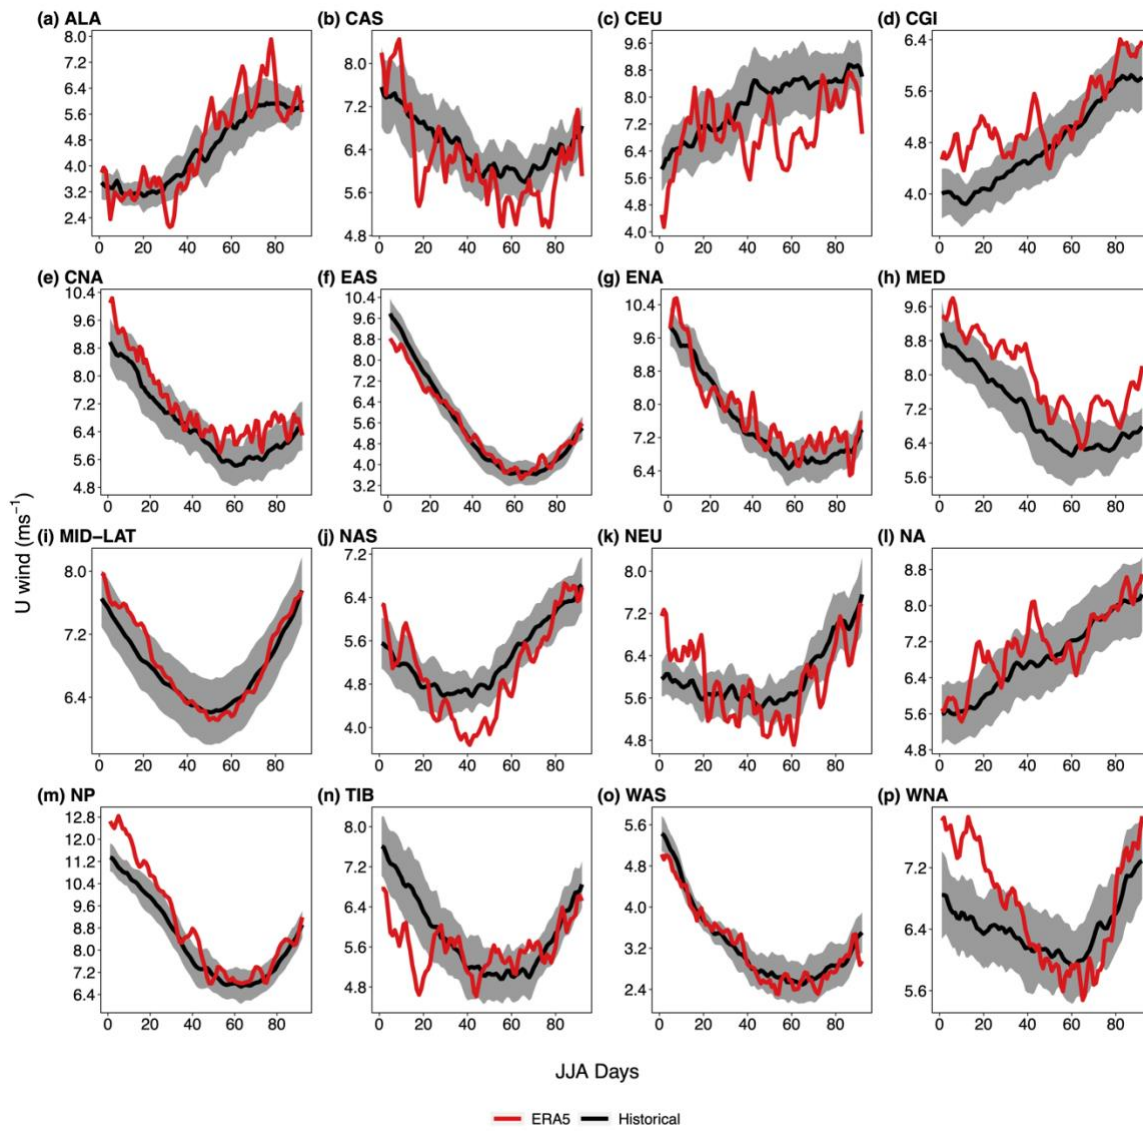

Figure S1. As Figure 2(b)-(q) but for U wind (ms<sup>-1</sup>).

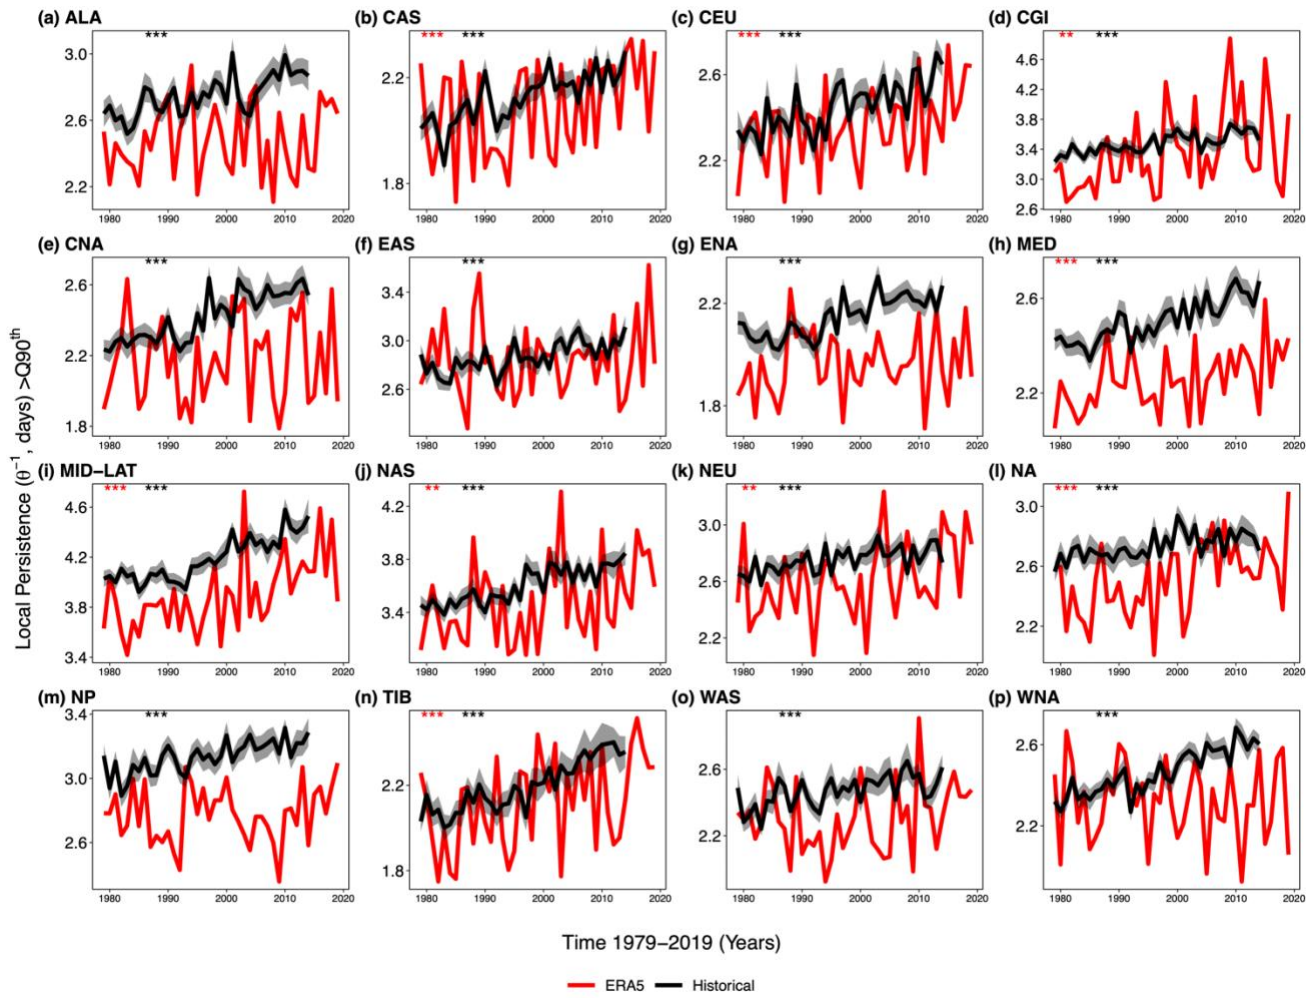

Figure S2. As Figure 3 but for trends in extreme persistence (exceeding the 90<sup>th</sup> percentile). See also Table S3.

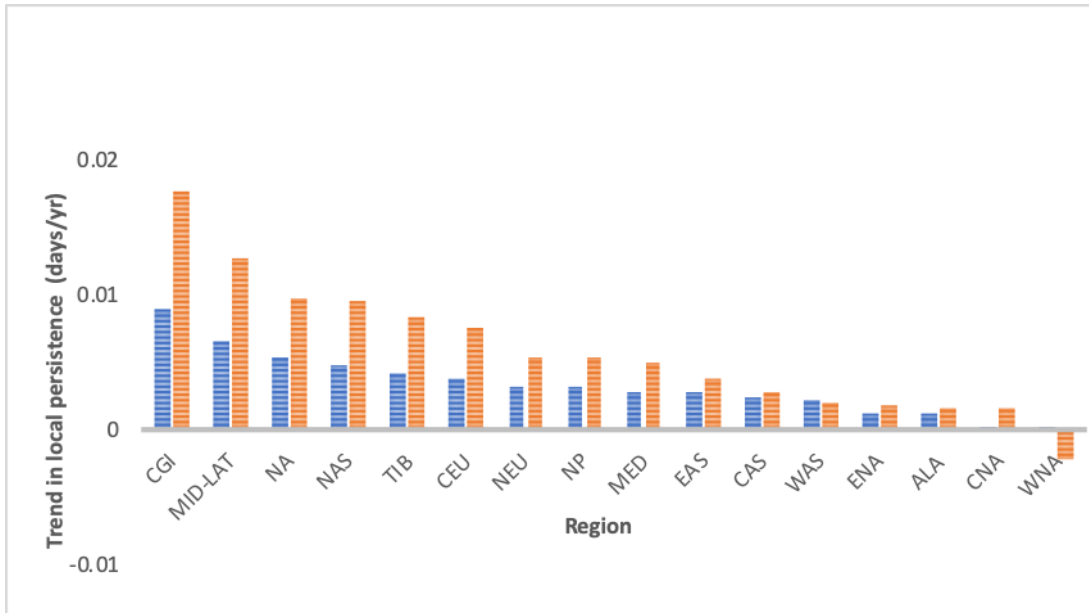

**Figure S3. Comparison between trends in mean (blue) and 90<sup>th</sup> percentile (orange) persistence in ERA5 over 1979-2019.** Regions are ordered according to the magnitude of the mean trend.

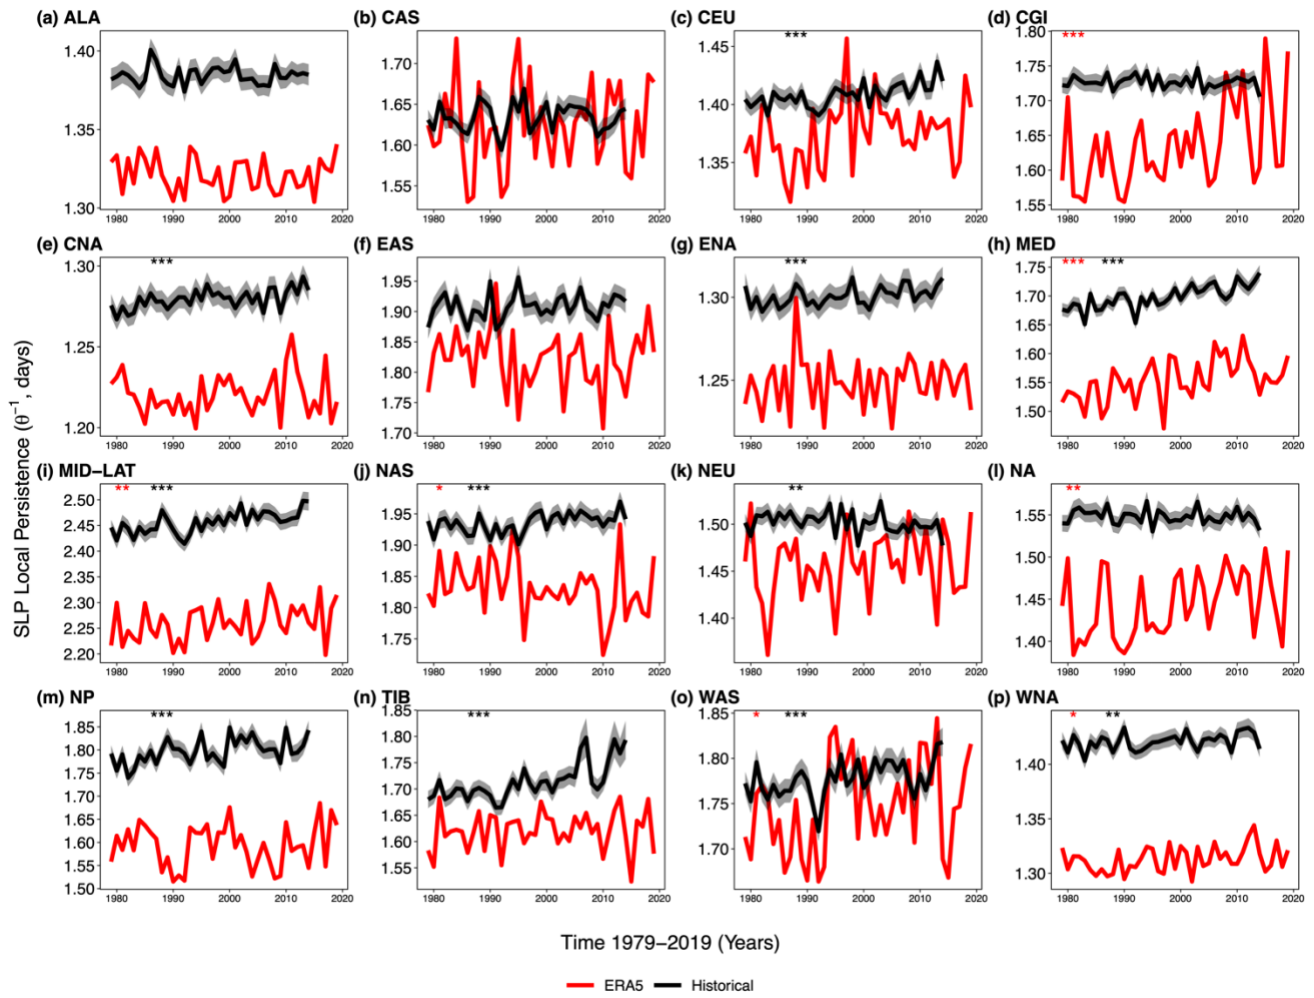

Figure S4. As Figure 3 bur for daily sea-level pressure (SLP) persistence. See also Table S4.

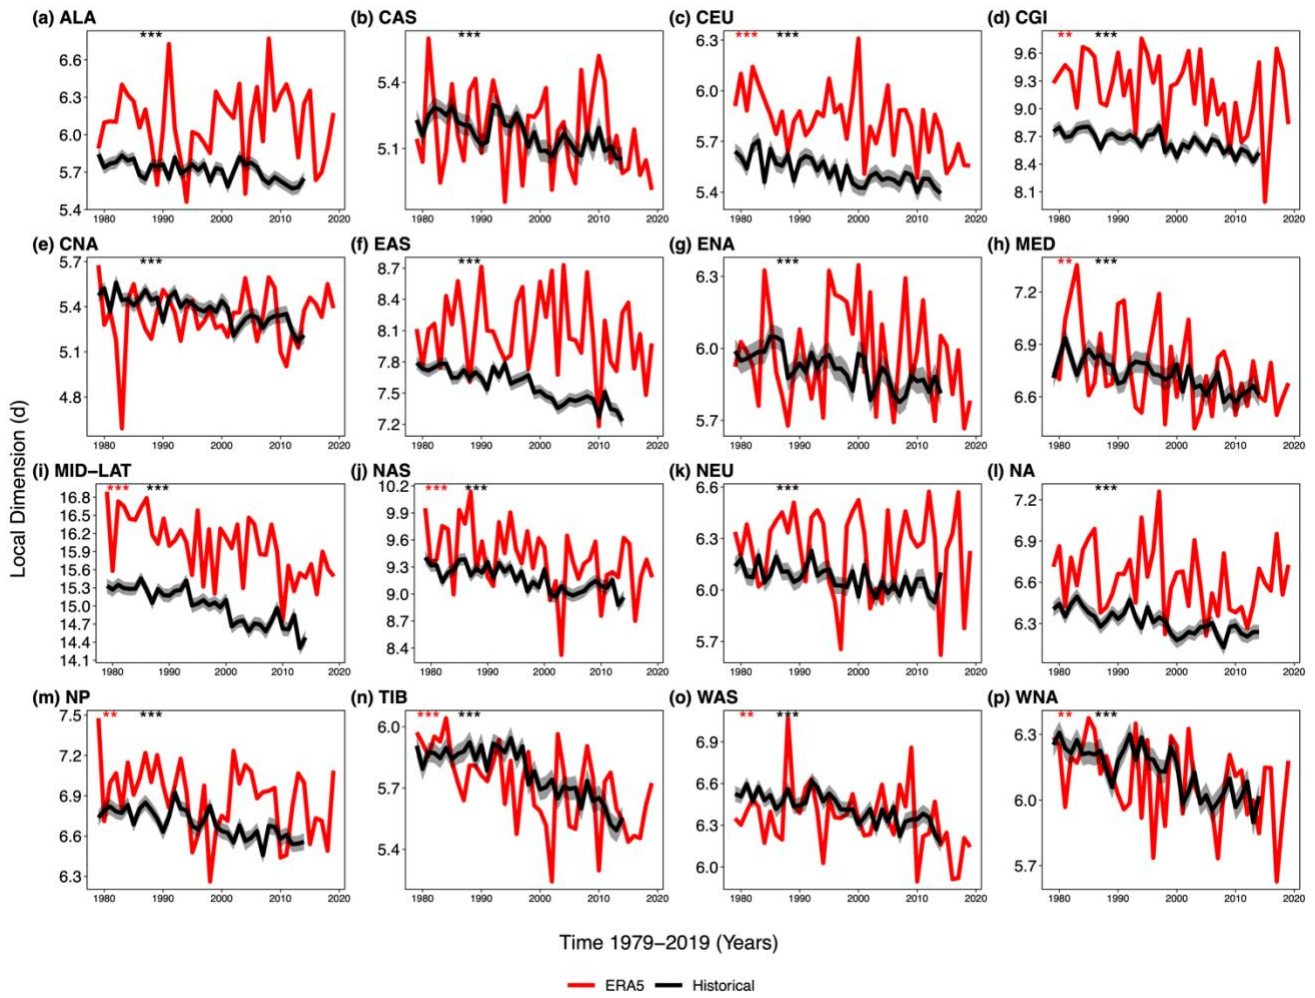

Figure S5. As Figure 3 but for the other dynamical systems metric local dimension (d).

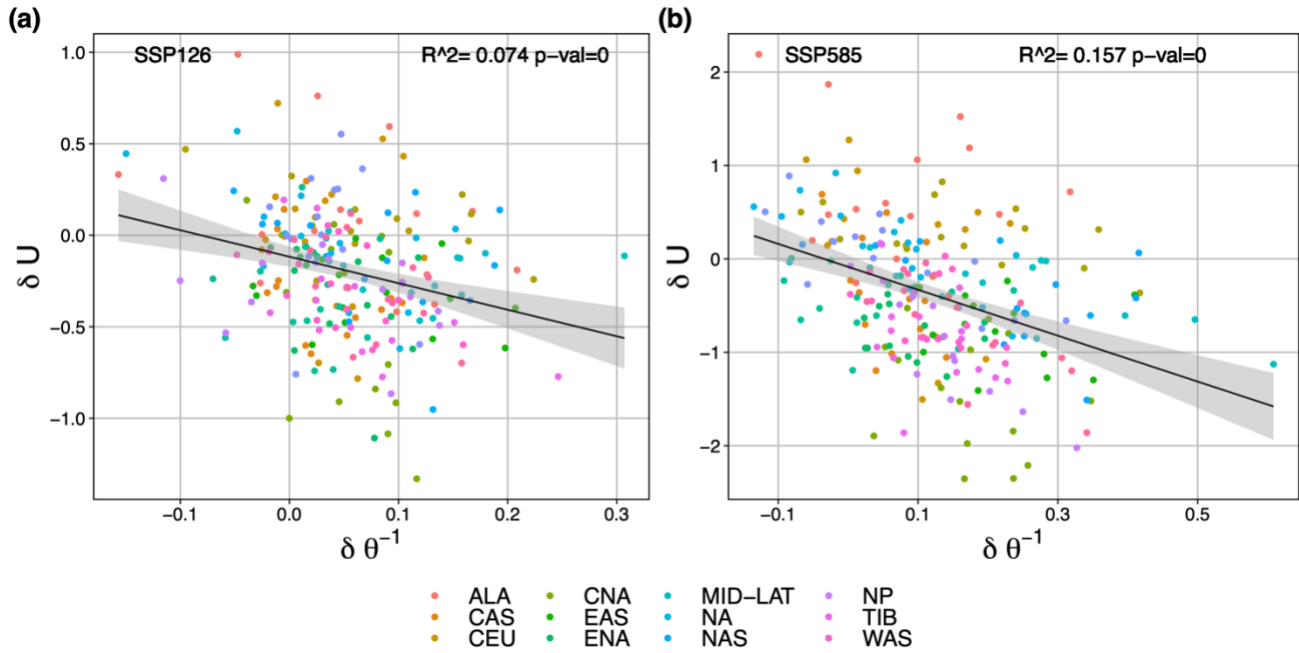

**Figure S6: Regression analyses between future changes in the July-August zonal wind ( $\delta U$ ) and persistence ( $\delta\theta_{-1}$ ) for SSP126 (left) and SSP585 (right) for mid-latitude regions (coloring).**  $\delta U$  and  $\delta\theta_{-1}$  are computed by subtracting historical values (mean over 1981-200) from the two SSPs (mean over 2081-2100). Grey shaded areas represent the 95% confidence intervals of the linear regressions.



Supplementary Tables

| CMIP6 model   | Nominal resolution | Variable | Time-period          | Ensemble member              |
|---------------|--------------------|----------|----------------------|------------------------------|
| ACCESS-CM2    | 250Km              | slp      | hist                 | rlilplf1                     |
|               |                    | ua       | hist, ssp126, ssp585 | rlilplf1, rlilplf1, rlilplf1 |
|               |                    | zg       | hist, ssp126, ssp585 | rlilplf1, rlilplf1, rlilplf1 |
| ACCESS-ESM1-5 | 250Km              | ua       | hist, ssp126, ssp585 | rlilplf1, rlilplf1, rlilplf1 |
|               |                    | zg       | ssp126, ssp585       | rlilplf1, rlilplf1           |
| AWI-CM-1-1-MR | 100Km              | ua       | ssp126, ssp585       | rlilplf1, rlilplf1           |
|               |                    | zg       | ssp126, ssp585       | rlilplf1, rlilplf1           |
| BCC-CSM2-MR   | 100Km              | slp      | hist                 | rlilplf1                     |
|               |                    | ua       | hist, ssp126, ssp585 | rlilplf1, rlilplf1, rlilplf1 |
|               |                    | zg       | hist, ssp126, ssp585 | rlilplf1, rlilplf1, rlilplf1 |
| CanESM5       | 500Km              | slp      | hist                 | rlilplf1                     |
|               |                    | ua       | hist, ssp126, ssp585 | rlilplf1, rlilplf1, rlilplf1 |
|               |                    | zg       | hist, ssp126, ssp585 | rlilplf1, rlilplf1, rlilplf1 |
| CESM2-WACCM   | 100Km              | slp      | hist                 | rlilplf1                     |
|               |                    | ua       | hist, ssp126, ssp585 | rlilplf1, rlilplf1, rlilplf1 |
|               |                    | zg       | hist, ssp126, ssp585 | rlilplf1, rlilplf1, rlilplf1 |
| CNRM-CM6-1-HR | 50Km               | ua       | ssp585               | rlilplf2                     |
|               |                    | zg       | ssp126, ssp585       | rlilplf2, rlilplf2           |
| CNRM-CM6-1    | 250Km              | slp      | hist                 | rlilplf2                     |
|               |                    | ua       | hist, ssp126, ssp585 | rlilplf2, rlilplf2, rlilplf2 |
|               |                    | zg       | hist, ssp126, ssp585 | rlilplf2, rlilplf2, rlilplf2 |
| CNRM-ESM2-1   | 250Km              | slp      | hist                 | rlilplf2                     |
|               |                    | ua       | hist, ssp126, ssp585 | rlilplf2, rlilplf2, rlilplf2 |
|               |                    | zg       | hist, ssp126, ssp585 | rlilplf2, rlilplf2, rlilplf2 |
| EC-Earth3     | 100Km              | slp      | hist                 | rlilplf1                     |
|               |                    | ua       | hist, ssp126, ssp585 | rlilplf1, r4ilplf1, r4ilplf1 |



|                 |       |     |                      |                              |
|-----------------|-------|-----|----------------------|------------------------------|
|                 |       | zg  | hist, ssp126, ssp585 | rlilplfl, r4ilplfl, r4ilplfl |
| EC-Earth3-Veg   | 100Km | ua  | hist, ssp126, ssp585 | rlilplfl, rlilplfl, rlilplfl |
|                 |       | zg  | ssp126, ssp585       | rlilplfl, rlilplfl           |
| GFDL-CM4        | 250Km | zg  | ssp585               | rlilplfl                     |
| HadGEM3-GC31-LL | 250Km | ua  | ssp126, ssp585       | rlilplf3, rlilplf3           |
|                 |       | zg  | ssp126, ssp585       | rlilplf3, rlilplf3           |
| INM-CM4-8       | 100Km | slp | hist                 | rlilplfl                     |
|                 |       | ua  | hist, ssp126, ssp585 | rlilplfl, rlilplfl, rlilplfl |
|                 |       | zg  | hist, ssp126, ssp585 | rlilplfl, rlilplfl, rlilplfl |
| INM-CM5-0       | 100Km | slp | hist                 | rlilplfl                     |
|                 |       | ua  | hist, ssp126, ssp585 | rlilplfl, rlilplfl, rlilplfl |
|                 |       | zg  | hist, ssp126, ssp585 | rlilplfl, rlilplfl, rlilplfl |
| IPSL-CM6A-LR    | 250Km | slp | hist                 | rlilplfl                     |
|                 |       | ua  | hist, ssp126, ssp585 | rlilplfl, rlilplfl, rlilplfl |
|                 |       | zg  | hist, ssp126, ssp585 | rlilplfl, rlilplfl, rlilplfl |
| MIROC6          | 250Km | slp | hist                 | rlilplfl                     |
|                 |       | ua  | hist, ssp126, ssp585 | rlilplfl, rlilplfl, rlilplfl |
|                 |       | zg  | hist, ssp126, ssp585 | rlilplfl, rlilplfl, rlilplfl |
| MPI-ESM1-2-HR   | 100Km | slp | hist                 | rlilplfl                     |
|                 |       | ua  | hist, ssp126, ssp585 | rlilplfl, rlilplfl, rlilplfl |
|                 |       | zg  | hist, ssp126, ssp585 | rlilplfl, rlilplfl, rlilplfl |
| MPI-ESM1-2-LR   | 250Km | slp | hist                 | rlilplfl                     |
|                 |       | ua  | hist, ssp126, ssp585 | rlilplfl, rlilplfl, rlilplfl |
|                 |       | zg  | hist, ssp126, ssp585 | rlilplfl, rlilplfl, rlilplfl |
| MRI-ESM2-0      | 100Km | slp | hist                 | rlilplfl                     |
|                 |       | ua  | hist, ssp126, ssp585 | rlilplfl, rlilplfl, rlilplfl |
|                 |       | zg  | hist, ssp126, ssp585 | rlilplfl, rlilplfl, rlilplfl |
| NorESM2-LM      | 250Km | slp | hist                 | rlilplfl                     |
|                 |       | ua  | hist, ssp126, ssp585 | rlilplfl, rlilplfl, rlilplfl |

|             |       |    |                      |                              |
|-------------|-------|----|----------------------|------------------------------|
|             |       | zg | hist, ssp126, ssp585 | rli1p1f1, rli1p1f1, rli1p1f1 |
| NorESM2-MM  | 100Km | ua | ssp126               | rli1p1f1                     |
|             |       | zg | ssp126, ssp585       | rli1p1f1, rli1p1f1           |
| UKESM1-0-LL | 250Km | ua | ssp126, ssp585       | rli1p1f2, rli1p1f2           |
|             |       | zg | ssp126, ssp585       | rli1p1f2, rli1p1f2           |

**Table S1. List of CMIP6 models, variables, runs and ensemble members used in the analyses.** Data have been downloaded from World Climate Research Programme (WCRP, <https://www.wcrp-climate.org/>).

| <b>CMIP6 Model</b> | <b>Variable</b> | <b>Region</b> | <b>Time-period</b> |
|--------------------|-----------------|---------------|--------------------|
| ACCESS-CM2         | zg              | MID-LAT       | Historical         |
| ACCESS-CM2         | zg              | TIB           | Historical         |
| ACCESS-CM2         | zg              | MID-LAT       | SSP126             |
| CNRM-CM6-1-HR      | zg              | MID-LAT       | SSP126             |
| HadGEM3-GC31-LL    | zg              | MID-LAT       | SSP126             |
| UKESM1-0-LL        | zg              | MID-LAT       | SSP126             |
| ACCESS-CM2         | zg              | TIB           | SSP126             |
| CNRM-CM6-1-HR      | zg              | TIB           | SSP126             |
| HadGEM3-GC31-LL    | zg              | TIB           | SSP126             |
| UKESM1-0-LL        | zg              | TIB           | SSP126             |
| CNRM-CM6-1-HR      | zg              | MID-LAT       | SSP585             |
| CNRM-CM6-1-HR      | zg              | TIB           | SSP585             |

**Table S2. Datasets excluded from the analyses because missing values (NAs) present in the original CMIP6 data.**

| Region  | Data       | Sen's slope | p-value  |
|---------|------------|-------------|----------|
| ALA     | ERA5       | 0.00117     | 0.45173  |
|         | Historical | 0.00388     | 0        |
| CAS     | ERA5       | 0.00237     | 0.05767  |
|         | Historical | 0.00336     | 0        |
| CEU     | ERA5       | 0.00373     | 0.00044  |
|         | Historical | 0.0039      | 0        |
| CGI     | ERA5       | 0.00899     | 0.00127  |
|         | Historical | 0.00524     | 0        |
| CNA     | ERA5       | 0.00027     | 0.77886  |
|         | Historical | 0.00577     | 0        |
| EAS     | ERA5       | 0.00278     | 0.09422  |
|         | Historical | 0.00629     | 0        |
| ENA     | ERA5       | 0.00125     | 0.11326  |
|         | Historical | 0.00398     | 0        |
| MED     | ERA5       | 0.0028      | 0.00363  |
|         | Historical | 0.00405     | 0        |
| MID-LAT | ERA5       | 0.00653     | 2,00E-05 |
|         | Historical | 0.0089      | 0        |
| NA      | ERA5       | 0.0054      | 0.00014  |
|         | Historical | 0.00339     | 0        |
| NAS     | ERA5       | 0.00482     | 0.00389  |
|         | Historical | 0.00684     | 0        |
| NEU     | ERA5       | 0.00319     | 0.04205  |
|         | Historical | 0.00284     | 0.00001  |
| NP      | ERA5       | 0.00311     | 0.06384  |
|         | Historical | 0.0056      | 0        |
| TIB     | ERA5       | 0.00425     | 0.00018  |
|         | Historical | 0.00501     | 0        |
| WAS     | ERA5       | 0.0021      | 0.02007  |
|         | Historical | 0.00331     | 0        |
| WNA     | ERA5       | 0.00018     | 0.83101  |
|         | Historical | 0.00533     | 0        |

**Table S3. Sen's slopes and p-values of local persistence Mann-Kendall trend tests for ERA5 (1979-2019) and CMIP6 multi-model mean (MMM) Historical runs (1979-2014). The Table refers to Figure 3.**

| <b>Region</b> | <b>Data</b> | <b>Sen's slope</b> | <b>p-value</b> |
|---------------|-------------|--------------------|----------------|
| ALA           | ERA5        | 0.00286            | 0.41226        |
|               | Historical  | 0.00821            | 0.00001        |
| CAS           | ERA5        | 0.0049             | 0.00679        |
|               | Historical  | 0.00716            | 0              |
| CEU           | ERA5        | 0.00535            | 0.00887        |
|               | Historical  | 0.00867            | 0              |
| CGI           | ERA5        | 0.01767            | 0.01078        |
|               | Historical  | 0.00941            | 0              |
| CNA           | ERA5        | 0.00158            | 0.56676        |
|               | Historical  | 0.01092            | 0              |
| EAS           | ERA5        | 0.00158            | 0.64515        |
|               | Historical  | 0.00834            | 0.00003        |
| ENA           | ERA5        | 0.00174            | 0.29622        |
|               | Historical  | 0.00589            | 0              |
| MED           | ERA5        | 0.00532            | 0.00148        |
|               | Historical  | 0.00733            | 0              |
| MID-LAT       | ERA5        | 0.01265            | 0.00007        |
|               | Historical  | 0.0142             | 0              |
| NA            | ERA5        | 0.00966            | 0.00314        |
|               | Historical  | 0.00472            | 0.00077        |
| NAS           | ERA5        | 0.00944            | 0.03018        |
|               | Historical  | 0.01109            | 0              |
| NEU           | ERA5        | 0.00838            | 0.02397        |
|               | Historical  | 0.0055             | 0.00016        |
| NP            | ERA5        | 0.00203            | 0.45173        |
|               | Historical  | 0.0065             | 0              |
| TIB           | ERA5        | 0.00752            | 0.00777        |
|               | Historical  | 0.01054            | 0              |
| WAS           | ERA5        | 0.00375            | 0.26615        |
|               | Historical  | 0.00578            | 0.00013        |
| WNA           | ERA5        | -0.00224           | 0.50753        |
|               | Historical  | 0.00939            | 0              |

**Table S4.** As Table S2 but it refers to Figure S2.

| Region  | Data       | Sen's slope | p-value |
|---------|------------|-------------|---------|
| ALA     | ERA5       | -0.00012    | 0.45173 |
|         | Historical | 0.00003     | 0.75407 |
| CAS     | ERA5       | 0.00077     | 0.3749  |
|         | Historical | 0.00008     | 0.81688 |
| CEU     | ERA5       | 0.00058     | 0.14736 |
|         | Historical | 0.00055     | 0.00016 |
| CGI     | ERA5       | 0.00226     | 0.00217 |
|         | Historical | 0.00002     | 0.9457  |
| CNA     | ERA5       | 0.00001     | 0.93733 |
|         | Historical | 0.00034     | 0.00034 |
| EAS     | ERA5       | -0.00012    | 0.83101 |
|         | Historical | 0.00047     | 0.16063 |
| ENA     | ERA5       | 0.00011     | 0.53674 |
|         | Historical | 0.00028     | 0.00523 |
| MED     | ERA5       | 0.00141     | 0.00217 |
|         | Historical | 0.00144     | 0       |
| MID-LAT | ERA5       | 0.00115     | 0.0213  |
|         | Historical | 0.00131     | 0.00007 |
| NA      | ERA5       | 0.00159     | 0.01011 |
|         | Historical | -0.00016    | 0.39083 |
| NAS     | ERA5       | -0.00097    | 0.07412 |
|         | Historical | 0.00063     | 0.00928 |
| NEU     | ERA5       | 0.00052     | 0.29622 |
|         | Historical | -0.00036    | 0.03971 |
| NP      | ERA5       | 0.00007     | 0.90167 |
|         | Historical | 0.00108     | 0.00523 |
| TIB     | ERA5       | 0.00052     | 0.45173 |
|         | Historical | 0.00194     | 0.00001 |
| WAS     | ERA5       | 0.00147     | 0.08169 |
|         | Historical | 0.00097     | 0.00312 |
| WNA     | ERA5       | 0.00028     | 0.07412 |
|         | Historical | 0.00032     | 0.01985 |

**Table S5.** As Table S2 but it refers to Figure S4.

| <b>Data</b> | <b>Sen's slope</b> | <b>p-value</b> | <b>Region</b> |
|-------------|--------------------|----------------|---------------|
| ERA5        | 0.00083            | 0.86621        | ALA           |
| Historical  | -0.00493           | 0.00022        | ALA           |
| ERA5        | -0.00351           | 0.16712        | CAS           |
| Historical  | -0.00529           | 0              | CAS           |
| ERA5        | -0.00806           | 0.00056        | CEU           |
| Historical  | -0.00609           | 1,00E-05       | CEU           |
| ERA5        | -0.0124            | 0.03018        | CGI           |
| Historical  | -0.00744           | 0              | CGI           |
| ERA5        | 2,00E-04           | 0.91948        | CNA           |
| Historical  | -0.0067            | 0              | CNA           |
| ERA5        | -0.00375           | 0.24732        | EAS           |
| Historical  | -0.01339           | 0              | EAS           |
| ERA5        | -0.00204           | 0.42518        | ENA           |
| Historical  | -0.005             | 1,00E-05       | ENA           |
| ERA5        | -0.00788           | 0.01225        | MED           |
| Historical  | -0.0069            | 0              | MED           |
| ERA5        | -0.02798           | 2,00E-05       | MID-LAT       |
| Historical  | -0.02501           | 0              | MID-LAT       |
| ERA5        | -0.00475           | 0.18135        | NA            |
| Historical  | -0.00625           | 0              | NA            |
| ERA5        | -0.01308           | 0.00727        | NAS           |
| Historical  | -0.01034           | 1,00E-05       | NAS           |
| ERA5        | -0.00142           | 0.58207        | NEU           |
| Historical  | -0.00401           | 0.00063        | NEU           |
| ERA5        | -0.00722           | 0.04681        | NP            |
| Historical  | -0.00793           | 0              | NP            |
| ERA5        | -0.00929           | 4,00E-05       | TIB           |
| Historical  | -0.00996           | 0              | TIB           |
| ERA5        | -0.00557           | 0.04438        | WAS           |
| Historical  | -0.00754           | 0              | WAS           |
| ERA5        | -0.00612           | 0.01306        | WNA           |
| Historical  | -0.00814           | 0              | WNA           |

**Table S6.** As Table S2 but it refers to **Figure S5**.



| Region  | SSP    | p-value | MMM $\delta\theta_{-1}$ |
|---------|--------|---------|-------------------------|
| ALA     | SSP126 | 0.19462 | 0.0564                  |
|         | SSP585 | 0.08034 | 0.074                   |
| CAS     | SSP126 | 0.21814 | 0.0283                  |
|         | SSP585 | 0.07424 | 0.0643                  |
| CEU     | SSP126 | 0.34134 | 0.0336                  |
|         | SSP585 | 0.14272 | 0.0833                  |
| CGI     | SSP126 | 0.14272 | 0.0711                  |
|         | SSP585 | 0.01045 | 0.1614                  |
| CNA     | SSP126 | 0.07424 | 0.0556                  |
|         | SSP585 | 0.0002  | 0.1705                  |
| EAS     | SSP126 | 0.12478 | 0.0794                  |
|         | SSP585 | 0.0064  | 0.2111                  |
| ENA     | SSP126 | 0.08034 | 0.0423                  |
|         | SSP585 | 0.00285 | 0.0871                  |
| MED     | SSP126 | 0.38742 | 0.0162                  |
|         | SSP585 | 0.19462 | 0.0314                  |
| MID-LAT | SSP126 | 0.03102 | 0.1182                  |
|         | SSP585 | 0.00288 | 0.2399                  |
| NA      | SSP126 | 0.32644 | 0.0309                  |
|         | SSP585 | 0.4351  | 0.0587                  |
| NAS     | SSP126 | 0.11641 | 0.079                   |
|         | SSP585 | 0.00158 | 0.2163                  |
| NEU     | SSP126 | 0.21814 | 0.0314                  |
|         | SSP585 | 0.16227 | 0.0675                  |
| NP      | SSP126 | 0.26965 | 0.0404                  |
|         | SSP585 | 0.03064 | 0.1298                  |
| TIB     | SSP126 | 0.15321 | 0.0639                  |
|         | SSP585 | 0.03833 | 0.1231                  |
| WAS     | SSP126 | 0.21814 | 0.0448                  |
|         | SSP585 | 0.01836 | 0.1235                  |
| WNA     | SSP126 | 0.08034 | 0.0725                  |
|         | SSP585 | 0.00158 | 0.1706                  |

**Table S7. Local persistence change ( $\delta\theta_{-1}$ ) and p-values of CMIP6 MMM SSP126 and SSP585 (2081-2100) compared with Historical (1981-2000).** Statistical significance was assessed with a Mann-Whitney test (one-tailed) under the null hypothesis that the SSPs persistence values are greater than the Historical's. The Table refers to Figure 4.
